# Supplementary figures and images for: Development of a β-Variational Autoencoder for Disentangled Latent Space Representation of Anterior Segment Optical Coherence Tomography Images
Source: PubMed Central journal article supplement — Transl Vis Sci Technol. 2022 Feb 8;11(2):11. doi: 10.1167/tvst.11.2.11 (PMC8842480; doi:10.1167/tvst.11.2.11), 2022-02-08

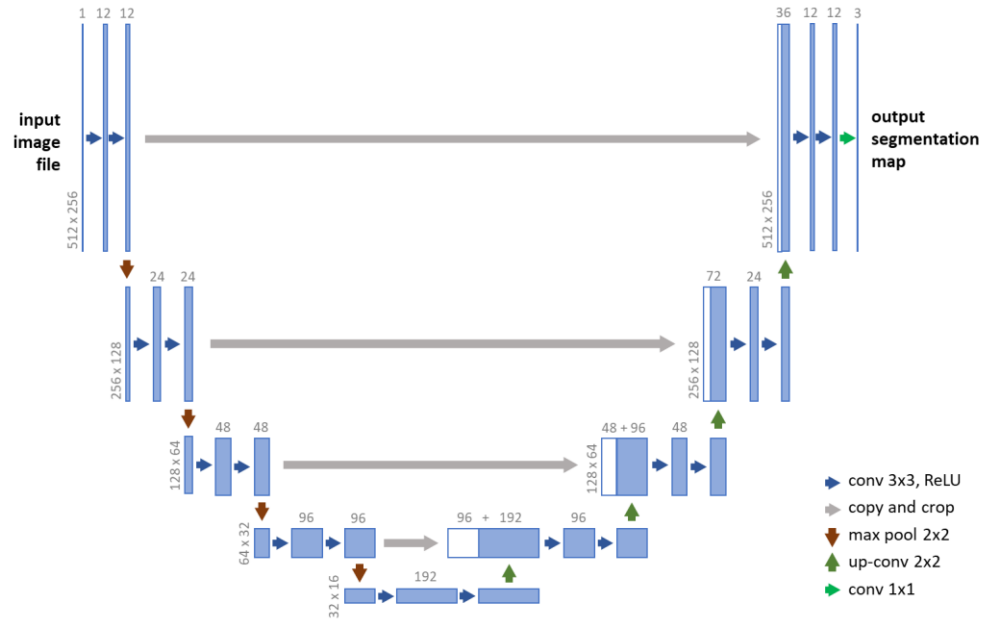

Supplementary Figure 1. Modified U-net architecture used for AS-OCT image segmentation.

Supplement: tvst-11-2-11_s001.pdf [file tvst-11-2-11_s001.pdf]

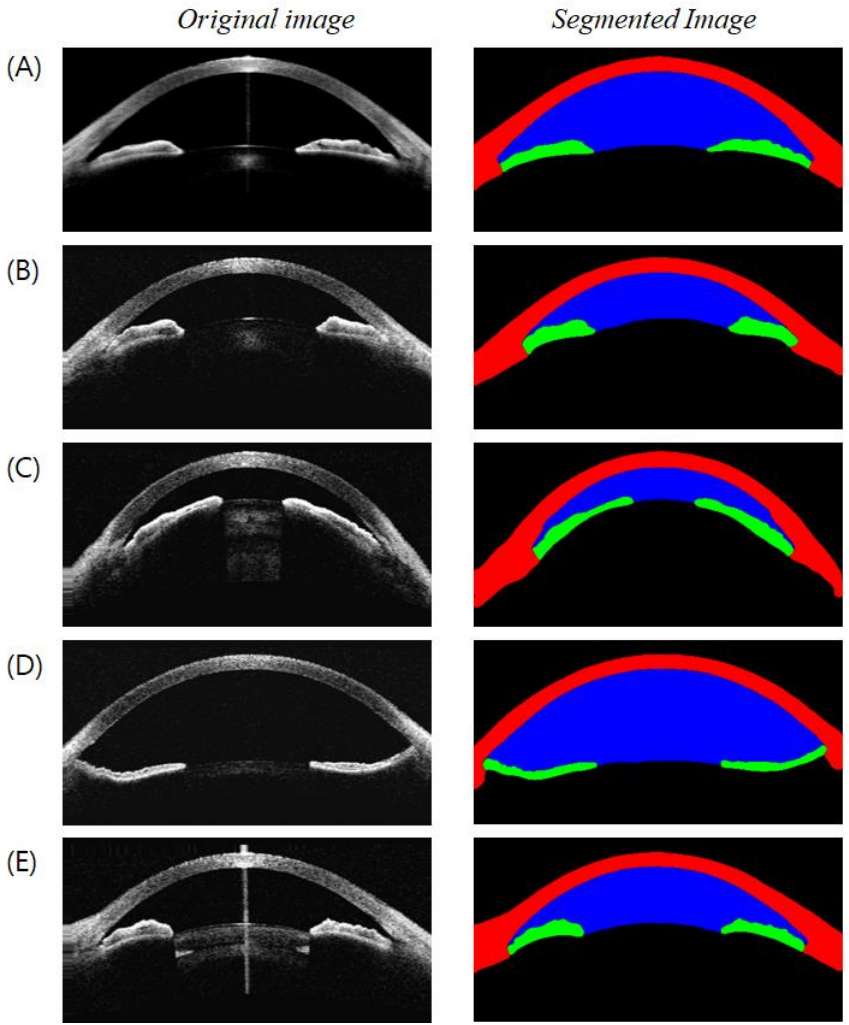

Supplementary Figure 2. Selected cases showing results from the segmentation network.

Supplement: tvst-11-2-11_s002.pdf [file tvst-11-2-11_s002.pdf]
